# Supplementary material for: Toward a Combination of Biomarkers for Molecular Characterization of Multiple Sclerosis
Source: MDPI journal article supplement (doi:10.3390/ijms232214000), 2022-11-13
Supplement: s1 [file s1]

## Supplementary Materials

**Supplementary Table S1.** List of probes used for qPCR

| <b>Gene name</b> | <b>Probe reference</b> |
|------------------|------------------------|
| <i>Bdnf</i>      | Mm01334043 m1          |
| <i>Ccl2</i>      | Mm00441242 m1          |
| <i>Cd20</i>      | Mm00545909 m1          |
| <i>Cd4</i>       | Mm00442754 m1          |
| <i>Cd8</i>       | Mm01182107 g1          |
| <i>Ch3l1</i>     | Mm00657889 mH          |
| <i>Cxcl13</i>    | Mm01208154 g1          |
| <i>Gfap</i>      | Mm01253033 m1          |
| <i>Hgf</i>       | Mm01135184 m1          |
| <i>Il17a</i>     | Mm00439616 m1          |
| <i>Mbp</i>       | Mm01266402 m1          |
| <i>Mmp2</i>      | Mm00439498 m1          |
| <i>Mmp9</i>      | Mm0442991 m1           |
| <i>Mog</i>       | Mm01279062 m1          |
| <i>Nfhl</i>      | Mm01191456 m1          |
| <i>Nfl</i>       | Mm01315666 m1          |
| <i>Ngf</i>       | Mm0443039 m1           |
| <i>Spp1</i>      | Mm00436767 m1          |
| <i>Stat1</i>     | Mm00439518 m1          |
| <i>Mapt</i>      | Mm00521988 m1          |
| <i>Plaur</i>     | Mm01149438 m1          |
| <i>Slc1a3</i>    | Mm00600697 m1          |
| <i>Tmem119</i>   | Mm005255305 m1         |
| <i>Gapdh</i>     | Mm999999915 g1         |

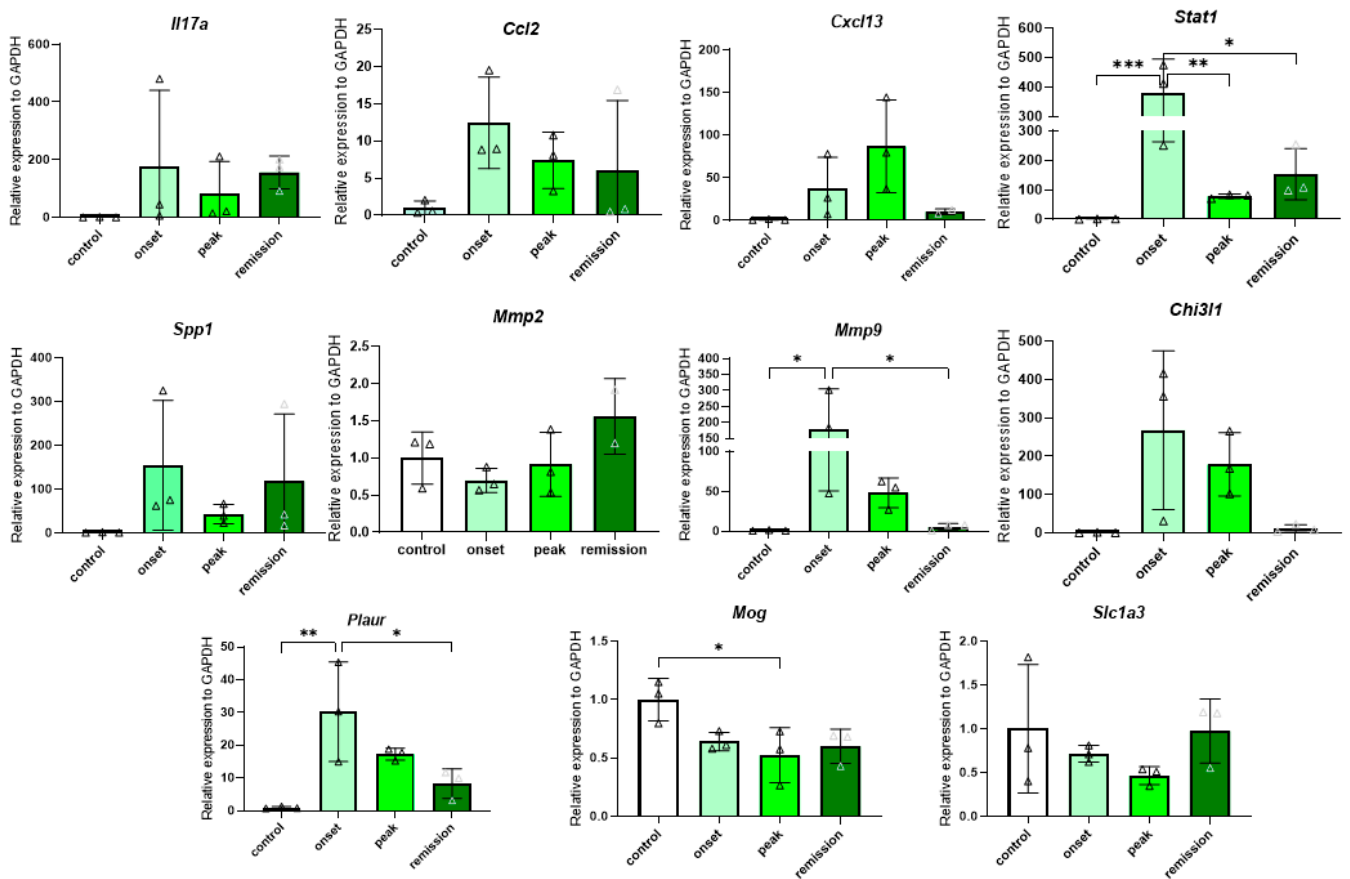

**Supplementary Figure S1.** Differential expression of genes in O4<sup>+</sup> cells during the different phases of PLP-induced EAE. The levels of mRNA transcripts for the selected genes relative to Gapdh were measured in O4<sup>+</sup> samples isolated from control and EAE mice on the onset, peak and remission phase by RTqPCR. A number of 3 mice was used in the experiment Each symbol represents a sample. \*  $p < 0.05$ , \*\*  $p < 0.01$ , \*\*\*  $p < 0.001$ , one-way ANOVA.

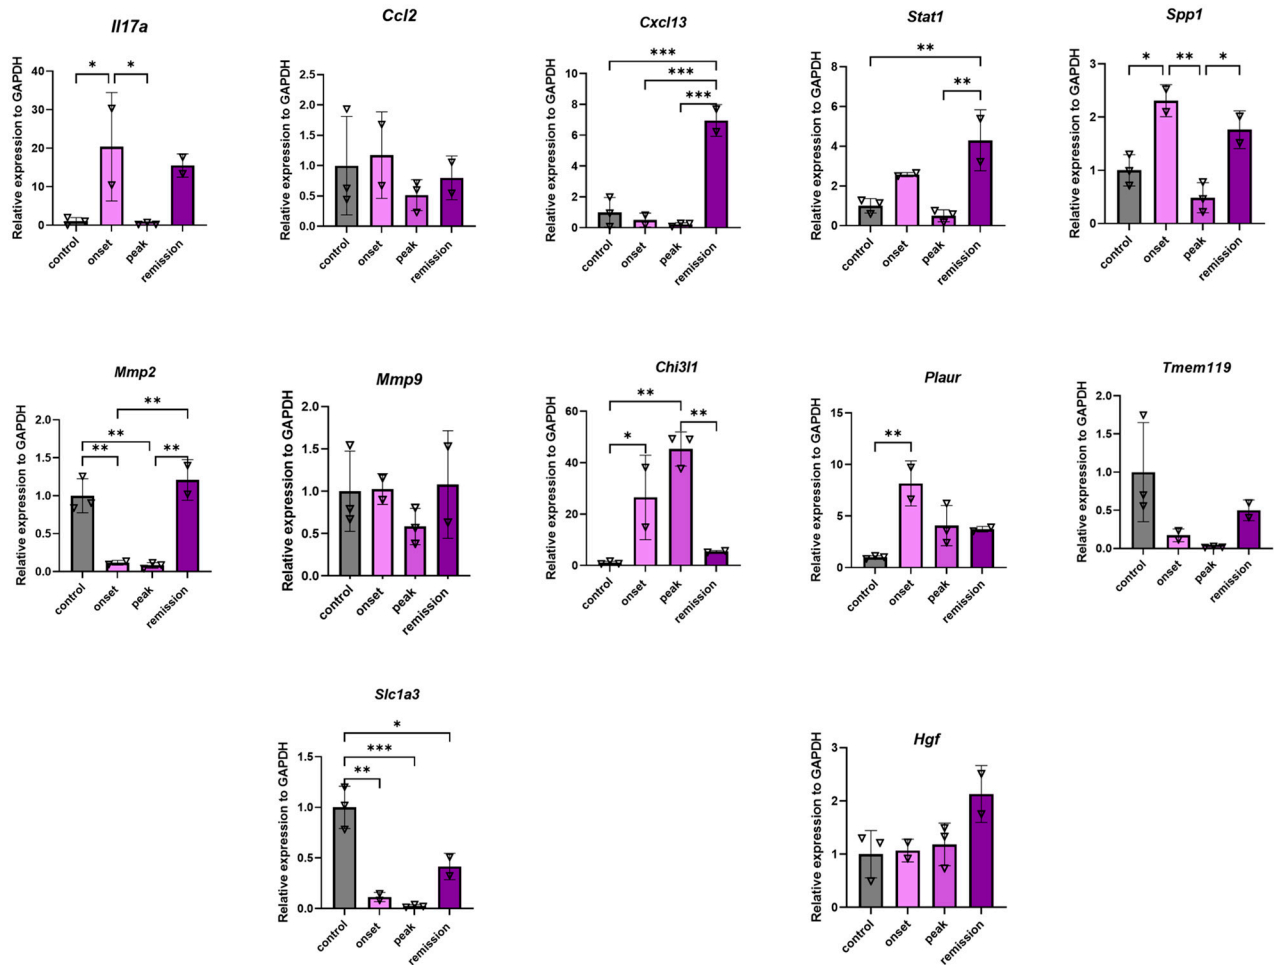

**Supplementary Figure S2.** Differential expression of genes in CD11b<sup>+</sup> cells during the different phases of PLP-induced EAE. The levels of mRNA transcripts for the selected genes relative to Gapdh were measured in CD11b<sup>+</sup> samples isolated from controls and EAE mice on the onset, peak and remission phase by RT-qPCR. A number of 2 to 3 mice was used in the experiment. Each symbol represents a sample. \*  $p < 0.05$ , \*\*  $p < 0.01$ , \*\*\*  $p < 0.001$ , one-way ANOVA.
